# Supplementary material for: Understanding the graphitization and growth of free-standing nanocrystalline graphene using in situ transmission electron microscopy
Source: Royal Society of Chemistry journal article supplement (doi:10.1039/c7nr03276e), 2017-01-01
Supplement: c7nr03276e1.pdf [file c7nr03276e1.pdf]

## Supporting information

### Electron dose during experiments

We were using low-dose conditions, keeping the illumination at an absolute minimum, taking a few selected images every 100 °C during the initial heating and blanking the beam in between. During reheating the dose was higher, with images acquired every 10 °C and blanking the beam in between. The dose for each single image varied between  $2.3 \times 10^6$  e/nm<sup>2</sup> at 300 Kx and  $4.8 \times 10^4$  e/nm<sup>2</sup> at 56 Kx. During the initial heating, we acquired on average 7 images at different magnifications for each temperature and with this the maximum final dose was less than  $10^8$  e/nm<sup>2</sup> during initial heating. During re heating, all images were acquired at 300 Kx and the final total dose during reheating was around  $2.2 \times 10^8$  e/nm<sup>2</sup>. High resolution images were acquired only after heating to 1200 °C and the dose was calculated to be  $2.1 \times 10^7$  e/nm<sup>2</sup> for each image.

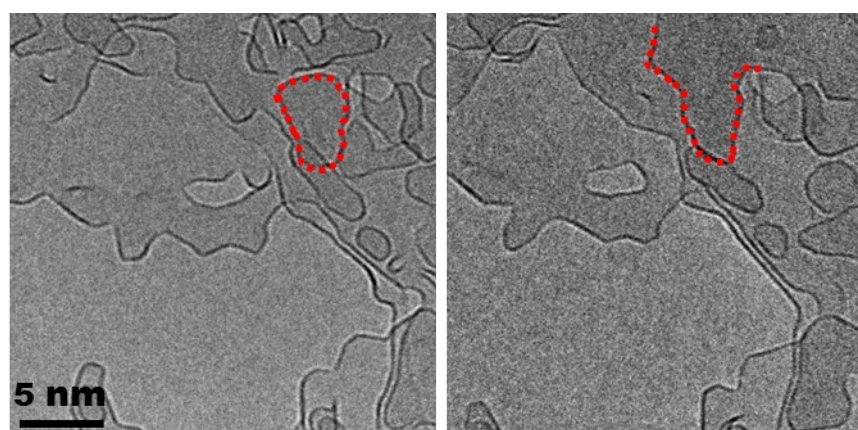

Figure S1: Merging of smaller domains to form larger ones during heating from 1100 °C to 1200 °C.

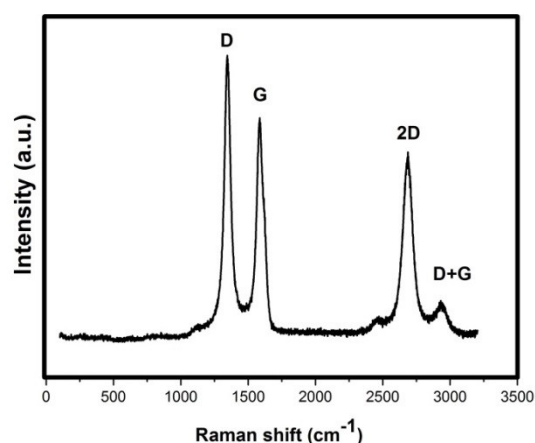

Figure S2: Raman Spectrum of graphitized sample at 1200°C

The spectrum consists of sharp D and G peak. The  $I_D/I_G$  ratio is 1.25 and the G peak position is at  $1585 \text{ cm}^{-1}$ . Also a well-defined 2D and D+G peak is visible in the spectrum indicating

the increased graphitic nature of the film. Comparing the position of the G peak and the  $I_D/I_G$  ratio to graphite, nanocrystalline graphite, diamond like carbon (DLC) with 20 %  $sp^3$  content (a-C) and DLC with 85 %  $sp^3$  (ta-c) following the graphitization trajectory suggested by Ferrari et al.<sup>1</sup>, the data fits well to nanocrystalline graphite and thus confirms the nanocrystalline nature with 100 %  $sp^2$  content. The evolution of the sharp 2D and D+G peak also confirms the highly graphitic nanocrystalline nature of the freestanding layer at 1200 °C.

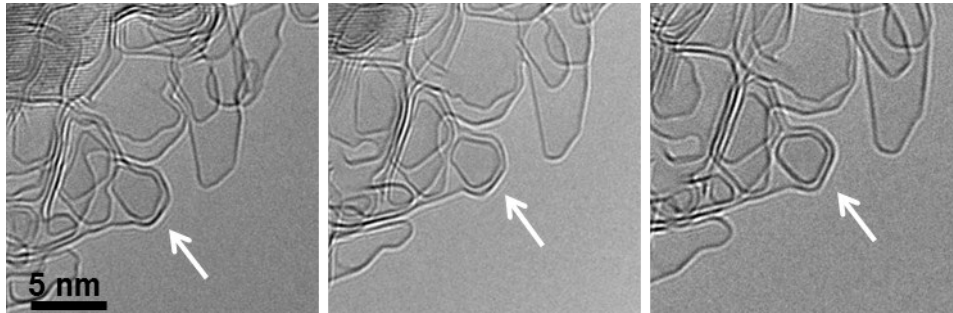

Figure S3: Transformation of a domain with disordered edges to defined faceted edges during prolonged heating. The size of the indicated domain is reducing during heating.

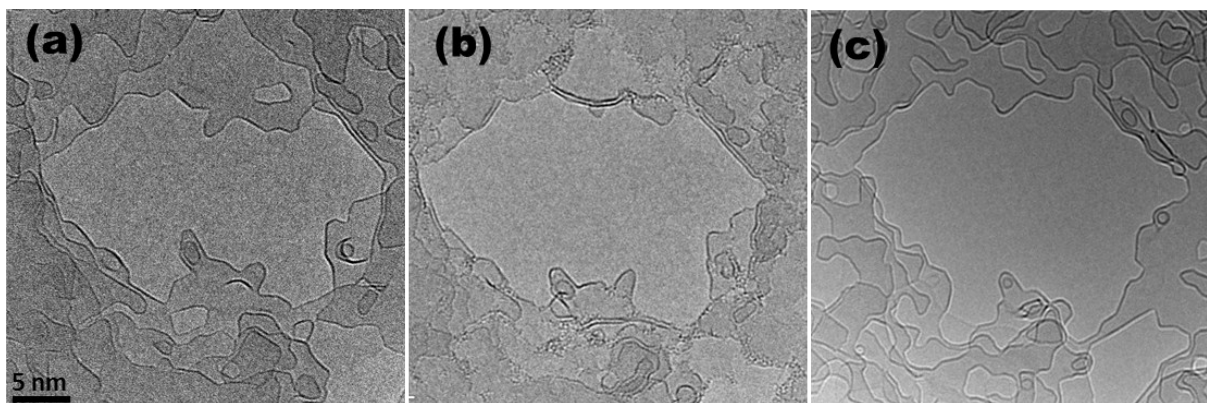

Figure S4 : Deposition of amorphous carbon on the sample (a) sample before adsorption of amorphous carbon (b) sample with the adsorbed amorphous carbon and (c) after reheating to 1200 °C. After re heating the sample, the amorphous carbon completely graphitizes increasing the dimensions of the domains.

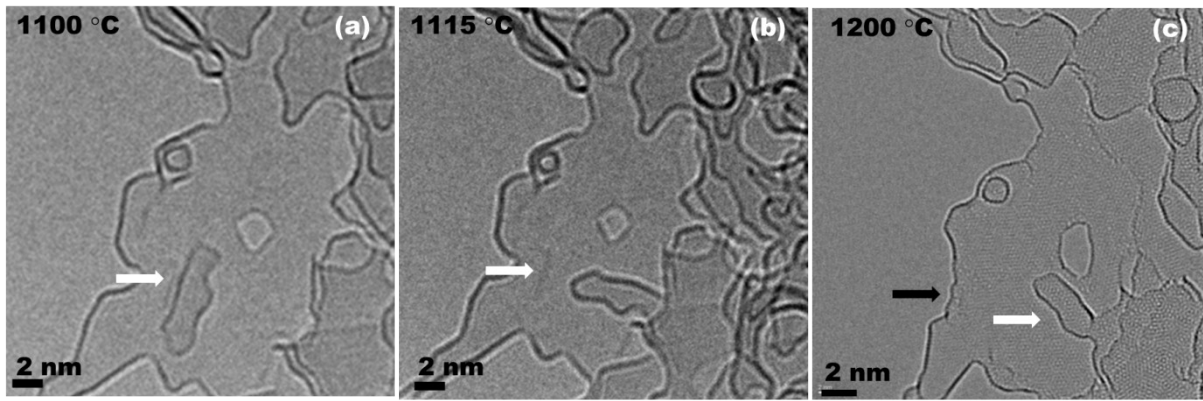

Figure S5: Migration of a small graphitic structure during heating (a, b). (c), high resolution images showing merging of the graphitic structure with a domain edge (marked by white arrows). The black arrow shows an area where a small cage like graphitic nuclei merged without discontinuity.

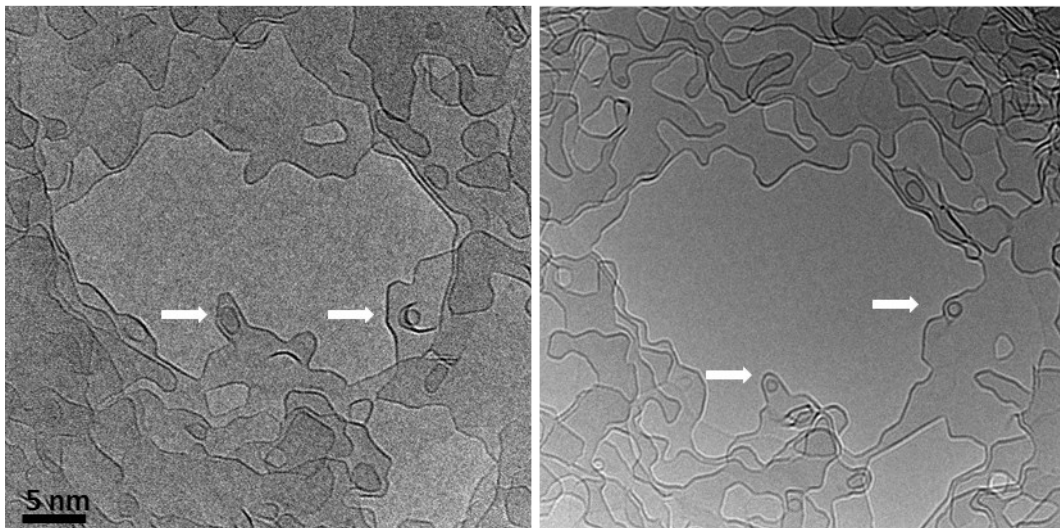

Figure S6: Trapped structures before and after reheating.

## References

1. A. C. Ferrari and J. Robertson, *Philos. Trans. R. Soc. A Math. Phys. Eng. Sci.*, 2004, **362**, 2477–2512.
